# Supplementary material for: Antimicrobial Resistance Genes and Diversity of Clones among Faecal ESBL-Producing Escherichia coli Isolated from Healthy and Sick Dogs Living in Portugal
Source: MDPI journal article supplement (doi:10.3390/antibiotics10081013), 2021-08-20
Supplement: s1 [file s1]

## Supplementary Material

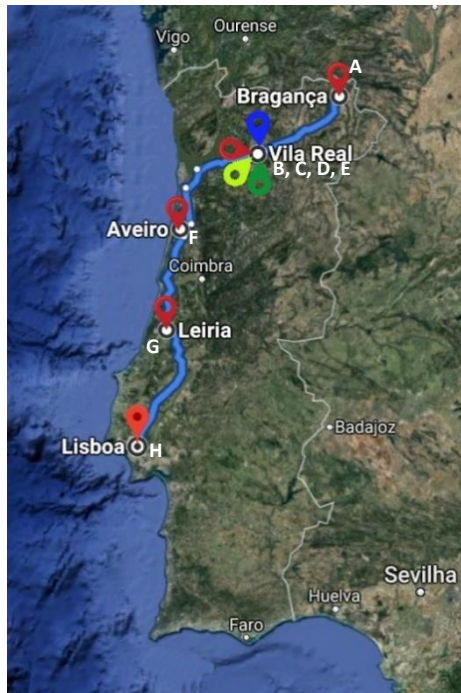

**Figure S1. – Geographic location of the different areas where the faecal samples from sick dogs were collected in Portugal.** **A** – *Clínica Veterinária de Macedo de Cavaleiros (Bragança)*; **B** – *Kennel (Vila Real)*; **C** - *Clínica Veterinária dos Quinchosos (Vila Real)*; **D** – *Transmonvete (Vila Real)*, **E** – *Hospital Veterinário de Trás os Montes HVTM (Vila Real)*; **F** - *Clínica Veterinária do Vouga (Aveiro)*; **G** - *Clínica Veterinária da Guia (Leiria)*; **H** – *Hospital Veterinário de São Bento (Lisboa)*.

**Table S1.** – Primers sequences and PCR conditions used for genes encoding antibiotic resistance in *E. coli*.

| Gene                                      | Antibiotics      | Primers sequences<br>(5')→(3')                 | PCR conditions                                                                       | Size band (bp) | References                    |
|-------------------------------------------|------------------|------------------------------------------------|--------------------------------------------------------------------------------------|----------------|-------------------------------|
| <i>bla<sub>TEM</sub></i>                  | <i>β-lactams</i> | ATTCTTGAAGACGAAAGGGC<br>ACGCTCAGTGGAACGAAAAC   | 94°C 3 min.<br>94°C 1 min.<br>60°C 1 min. (30 cycles)<br>72°C 1 min.<br>72°C 10 min. | 1150           | (Pitout <i>et al.</i> , 1998) |
| <i>bla<sub>SHV</sub></i>                  | <i>β-lactams</i> | CACTCAAGGATGTATTGTG<br>TTAGCGTTGCCAGTGCTCG     | 96°C 5 min.<br>96°C 15 s<br>52°C 15 s (24 cycles)<br>72°C 2 min.<br>72°C 5 min.      | 885            | (Pitout <i>et al.</i> , 1998) |
| <i>bla<sub>CTX-M-9</sub></i><br>(Group 9) | <i>β-lactams</i> | GTGACAAAGAGAGTGCAACGG<br>ATGATTCTCGCCGCTGAAGCC | 94°C 3 min.<br>94°C 45 s<br>62°C 45s (35 cycles)<br>72°C 45 s<br>72°C 10 min.        | 857            | (Zong <i>et al.</i> , 2008)   |

|                                            |                    |                                               |                                                                                   |      |                                  |
|--------------------------------------------|--------------------|-----------------------------------------------|-----------------------------------------------------------------------------------|------|----------------------------------|
| <i>bla</i> <sub>CTX-M-1</sub><br>(Group 1) | <i>β-lactams</i>   | GTTACAATGTGTGAGAAGCAG<br>CCGTTTCCGCTATTACAAAC | 94°C 7 min.<br>94°C 50 s.<br>50°C 40 s. (35 cycles)<br>68°C 1 min.<br>68°C 5 min. | 1017 | (Zong <i>et al.</i> , 2008)      |
| <i>bla</i> <sub>CTX-M-UNIVERSAL</sub>      | <i>β-lactams</i>   | CGATGTGCAGTACCAGTAA<br>TTAGTGACCAGAATCAGCGG   | 94°C 5 min.<br>94°C 30 s<br>60°C 30 s (35 cycles)<br>72°C 1 min.<br>72°C 5 min.   | 585  | (Zong <i>et al.</i> , 2008)      |
| <i>bla</i> <sub>CMY-2</sub>                | <i>β-lactams</i>   | GATTCCTTGGACTCTTCAG<br>TAAAACCAGGTTCCCAGATAGC | 95°C 3 min.<br>95°C 30 s<br>53°C 30 s (35 cycles)<br>72°C 30 s<br>72°C 3 min.     | 1807 | (Hassen <i>et al.</i> , 2019)    |
| <i>bla</i> <sub>KPC2/3</sub>               | <i>carbapenems</i> | GTATCGCCGTCTAGTTCTGC<br>GGTCGTGTTTCCCTTTAGCC  | 94°C 5 min.<br>94°C 30 s<br>58°C 30 s (25 cycles)<br>72°C 1 min.<br>72°C 7 min.   | 638  | (Ellington <i>et al.</i> , 2007) |
| <i>bla</i> <sub>OXA-48</sub>               | <i>carbapenems</i> | TTGGTGGCATCGATTATCGG<br>GAGCACTTCTTTTGTGATGGC | 96°C 5 min.<br>96°C 1 min.<br>61°C 1 min. (35 cycles)<br>72°C 2 min.              | 743  | (Ruiz, 2011)                     |

|                          |                     |                                                |                                                                                    |     |                                  |
|--------------------------|---------------------|------------------------------------------------|------------------------------------------------------------------------------------|-----|----------------------------------|
|                          |                     |                                                | 72°C 10 min.                                                                       |     |                                  |
| <i>bla<sub>VEB</sub></i> | <i>carbapenems</i>  | CGACTTCCATTTCCCGATGC<br>GGACTCTGCAACAAATACGC   | 94°C 5 min.<br>94°C 30 s<br>58°C 30 s (25 cycles)<br>72°C 1 min.<br>72°C 7 min.    | 643 | (Ellington <i>et al.</i> , 2007) |
| <i>bla<sub>VIM</sub></i> | <i>carbapenems</i>  | GATGGTGTTTGGTCGCATA<br>CGAATGCGCAGCACCAG       | 94°C 5 min.<br>94°C 30 s.<br>52°C 40 s (36 cycles)<br>72°C 50 s.<br>72°C 5 min.    | 390 | (Ellington <i>et al.</i> , 2007) |
| <i>bla<sub>NDM</sub></i> | <i>carbapenems</i>  | AATATTATGCACCCGGTCGCG<br>CATCACGATCATGCTGGCCTT | 94°C 5 min.<br>94°C 1 min.<br>52°C 1 min (30 cycles)<br>72°C 1 min.<br>72°C 7 min. | 804 | (Ellington <i>et al.</i> , 2007) |
| <i>tetA</i>              | <i>tetracycline</i> | GTAATTCTGAGCACTGTCGC<br>CTGCCTGGACAACATTGCTT   | 95°C 5 min.<br>95°C 30 s<br>62°C 30 s (23 cycles)<br>72°C 45 s<br>72°C 7 min.      | 937 | (Ellington <i>et al.</i> , 2007) |

|              |                     |                                                |                                                                                          |     |                                  |
|--------------|---------------------|------------------------------------------------|------------------------------------------------------------------------------------------|-----|----------------------------------|
| <i>tetB</i>  | <i>tetracycline</i> | CTCAGTATTCCAAGCCTTTG<br>CTAAGCACTTGTCTCCTGTT   | 95°C 5 min.<br>95°C 30 s<br>57°C 30 s (25 cycles)<br>72°C 20 s<br>72°C 7 min.            | 416 | (Ellington <i>et al.</i> , 2007) |
| <i>mcr-1</i> | <i>colistin</i>     | CTTGGTCGGTCTGTAGGG<br>CGGTCAGTCCGTTTGTTT       | 94°C 15 min.<br>94°C 30 min.<br>58°C 1,5 min. (25 cycles)<br>72°C 1 min.<br>72°C 10 min. | 309 | (Liu <i>et al.</i> , 2016)       |
| <i>int1</i>  | integron            | GGGTCAAGGATCTGGATTTCG<br>ACATGCGTGTAATCATCGTCG | 94°C 5 min.<br>94°C 30 s<br>62°C 30 s (30 cycles)<br>72°C 1 min.<br>72°C 8 min.          | 483 | (Vinué, 2008)                    |
